# Supplementary material for: Synergistic Stabilization and Ecological Restoration in Multi-Metal Contaminated Soil: The Efficacy of Fe/Mn (Hydr)oxide-Phosphate Composites (FMPs) for Cd, Pb, Cu, Zn
Source: Research Square preprint supplement (doi:10.21203/rs.3.rs-8576852/v1), 2026-01-23
Supplement: Supplementary file 1 [file cb1c3d33940385ae9c8d15c8.docx]

**SUPPORTING INFORMATION**

**Synergistic Stabilization and Ecological Restoration in Multi-Metal Contaminated Soil: The Efficacy of Fe/Mn (Hydr)oxide-Phosphate Composites (FMPs) for Cd, Pb, Cu, Zn**

Rui Xua, b, c†, Yuchen Shia, b†, Lang Liaoc, Zhe Yinc, Qian Li c, [[1]](#footnote-1)*, Guangfei Qua, b*, Yan Zhangc, Chenyang Yina, b, Yaxin Tiana, b

a *Faculty of Environmental Science and Engineering, Kunming University of Science and Technology, Yunnan, Kunming, 650500, P. R. China*

*b National-Regional Engineering Research Center for Recovery of Waste Gases from Metallurgical and Chemical Industries, Kunming 650500, Yunnan, P. R. China*

*c School of Minerals Processing and Bioengineering, Central South University, Changsha, Hunan 410083, P. R. China*

***Text S1.****DNA Extraction, PCR Amplification, and High-Throughput Sequencing*

The soil microbial community structure was analyzed using high-throughput sequencing technology. Total genomic DNA was extracted from 0.5 g of soil samples using the E.Z.N.A.® Soil DNA Kit (Omega Bio-Tek Inc., Norcross, USA), following the manufacturer’s protocol. DNA concentration and purity were assessed using a NanoDrop 2000 UV−vis spectrophotometer (Thermo Scientific, Wilmington, USA), and DNA quality was verified by 1% agarose gel electrophoresis. The V4 region of bacterial 16S rRNA genes was amplified using primers 515FmodF (5'−GTGYCAGCMGCCGCG−GTAA−3') and 806RmodR (5'−GGACTACNVGG− GTWTCTAAT−3'), while fungal ITS regions were amplified using primers ITS1F (5'−CTTGGTCATTTAGAGGAAGTAA) and ITS2R (5'−GCTGCGTTCTTCAT− CGATGC). PCR amplification was performed using TransStart Fastpfu DNA Polymerase in a 20 μL reaction mixture containing 4 μL of 5×FastPfu Buffer, 2 μL of dNTPs (2.5 mmol/L), 0.8 μL of each forward and reverse primer (5 μmol/L), 0.4 μL of Fastpfu Polymerase, 0.2 μL of bovine serum albumin (BSA), and 10 ng of DNA template, with ddH2O added to achieve a final volume of 20 μL. Thermal cycling was conducted on a GeneAmp®9700 thermocycler (ABI, USA) with the following parameters: initial denaturation at 95 °C for 3 min, followed by 27 (bacterial) or 35 (fungal) cycles of denaturation at 95 °C for 30 s, annealing at 55 °C for 30 s, extension at 72 °C for 45 s, and a final extension at 72 °C for 10 min. PCR products were extracted from 2% agarose gels, purified using the AxyPrep DNA Gel Extraction Kit (AxyPrep Biosciences, Union City, CA, USA), and quantified using QuantiFluor™−ST (Promega, Madison, WI, USA) according to the manufacturer’s instructions. Purified amplicons were sequenced on the Illumina MiSeq platform (Illumina, San Diego, CA, USA) at Shanghai Majorbio Bio−Pharm Technology Co., Ltd.

***Text S2.*** *Statistical analysis*

Soil microbial alpha diversity indices were estimated using the QIIME2 software. Beta diversity was assessed through principal coordinate analysis (PCoA) based on Bray−Curtis distances. The STAMP software was employed to identify genera exhibiting significant differences among treatment groups. The Linear Discriminant Analysis (LDA) Effect Size (LEfSe) algorithm (https://huttenhower.sph. harvard.edu/galaxy/) was utilized to identify biomarkers within soil bacterial and fungal communities. The Kruskal−Wallis test was applied to determine taxa with significantly different abundances across samples, and the LDA method was used to estimate the effect size of each feature. Venn diagrams were generated using the "VennDiagram" package in R. Correlation heatmaps were constructed using the "pheatmap" package in R to evaluate relationships between environmental factors and selected taxa.

Molecular ecological networks (MENs) were constructed based on Random Matrix Theory (RMT) and analyzed for network topological properties using the MENA platform (http://ieg4.rccc.ou.edu/MENA/). Only operational taxonomic units (OTUs) present in all six replicate samples were retained for network analysis. Network topological properties, including modularity, average degree, average clustering coefficient, and average path distance, were used to characterize the networks. Network visualization was performed using Gephi software (version 0.9.2), and modularity optimization was achieved using a greedy algorithm. The topological roles of nodes were determined by their within-module connectivity (*Zi*) and among-module connectivity (*Pi*), classifying them into four categories [1, 2]: peripherals (*Zi* < 2.5, *Pi* < 0.62), module hubs (*Zi* > 2.5, *Pi* < 0.62), connectors (*Zi* < 2.5, *Pi* > 0.62), and network hubs (*Zi* > 2.5, *Pi* > 0.62). Mantel tests were conducted to analyze correlations between different variable matrices. Analysis of variance (ANOVA) was used to test for significant differences among groups, with Tukey’s test applied at a significance level of 0.05. Pearson correlation coefficients were calculated to assess the degree of correlation between variables.


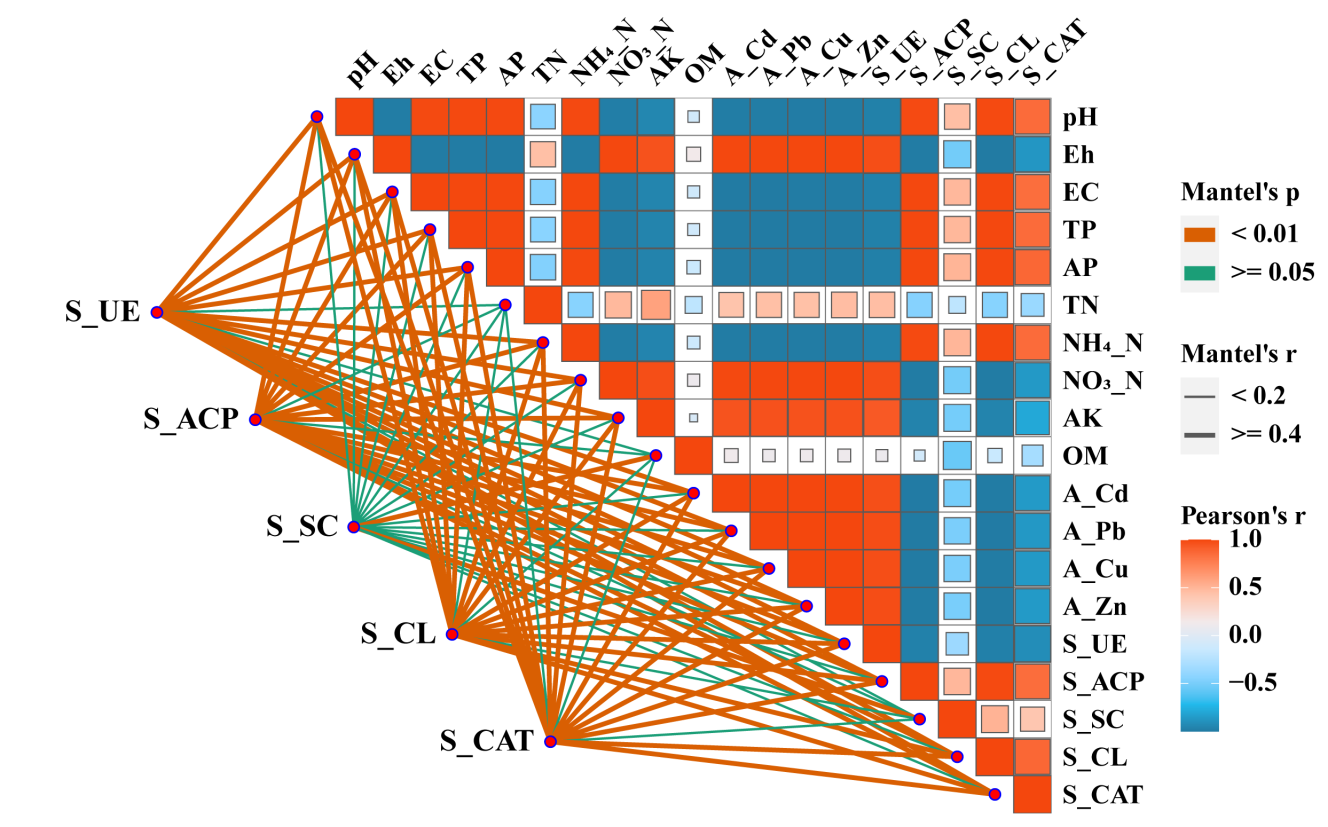


**Fig. S1.** Correlation of soil enzyme activities and environmental factors. The edge width corresponds to Mantel's r-value, and the color of the edge indicates statistical significance, pairwise correlations between variables are represented by the color gradient, denoting Pearson's correlation coefficients.

**Fig. S2.** Alpha diversity indexes of soil microorganisms under different treatments (Shannon and Simpson, Ace and Chao1). Bacteria (a)~(d)，Fungi (a')~(d').

**Fig. S3.** Relative abundances and differences of dominant bacteria and fungi in soil samples of different treatment groups at phylum and genus levels. bacteria (a/c) and fungi (b/d)，phylum (a/b) and genus (c/d).

**Fig. S4.** Heat map of Spearman correlation analysis between soil environmental factors and core species at phylum (a) and genus (b) levels (" * "0.01 < p ≤ 0.05," ** "0.001 < p ≤ 0.01," *** "p ≤ 0.001).

**Fig. S5.** Co-occurrence network analysis of soil bacterial (a)/(b) and fungal (c)/(d) communities in CK group (a)/(c) and FMPs5 treatment group (b)/(d). The nodes are colored according to phyla. Each node represents an OTU, and the size of the node is proportional to its degree.

**Table S1** Heavy metal content in cadmium, lead, copper, and zinc contaminated soil.

| Background | pH | T_Cd(mg/kg) | T_Pb(mg/kg) | T_Cu(mg/kg) |
| --- | --- | --- | --- | --- |
| Sandy loam | 6.9±0.2 | 240.10±20.35 | 459.13±26.97 | 397.43±25.84 |
| T_Zn(mg/kg) | A_Cd(mg/kg) | A_Pb(mg/kg) | A_Cu(mg/kg) | A_Zn(mg/kg) |
| 904.25±63.70 | 24.52±2.56 | 25.34±3.60 | 13.41±1.57 | 25.39±2.39 |

**Table S2** Effects of different dosages of FMPs on the leaching toxicity (Sulfuric acid & nitric acid method) of Cd, Pb, Cu, and Zn in soil.

| Process group | Cd(mg/L) | Pb(mg/L) | Cu(mg/L) | Zn(mg/L) |
| --- | --- | --- | --- | --- |
| Groundwater quality category IV standard | ≤0.01 | ≤0.01 | ≤1.50 | ≤5.00 |
| Control group (60d) | 25.39±1.56 | 23.61±2.07 | 14.06±1.12 | 26.79±1.67 |
| FMPs1 treatment group (60d) | 5.58±0.58 | <0.03 | 3.51±0.17 | 16.95±0.66 |
| FMPs2 treatment group (60d) | 0.54±0.19 | <0.03 | 2.54±0.78 | 4.26±0.12 |
| FMPs3 treatment group (60d) | <0.01 | <0.03 | 0.62±0.16 | 0.98±0.27 |

**Table S3** Topological parameters of the microbial co-occurrence networks in CK and FMPs5 treatment groups.

| Network parameter | viruses | | fungi | |
| --- | --- | --- | --- | --- |
| CK | FMPs5 | CK | FMPs5 |
| Number of nodes | 1180 | 1113 | 353 | 367 |
| number of connections | 1482 | 1568 | 437 | 393 |
| mean value | 2.512 | 2.818 | 2.476 | 2.142 |
| Average path distance | 14.509 | 10.308 | 14.754 | 6.722 |
| Average aggregation factor | 0.309 | 0.309 | 0.253 | 0.182 |
| densities | 0.002 | 0.003 | 0.007 | 0.006 |
| concentration | 0.009 | 0.015 | 0.010 | 0.016 |

**Table S4** Affiliation of keystone taxa in Module hubs (Zi > 2.5, Pi < 0.62) in the Zi-Pi diagram, P: Phylum, C: Class, O: Order, F: Family, G: Genus.

| Groups | Knot | Categories |
| --- | --- | --- |
| CK， viruses | OTU4430  OTU2931  OTU4442  OTU8822 | P:Proteobacteria G:*Aquicella*  P:Proteobacteria G:*Sphingopyxis*  P: Proteobacteria G: *Coxiella*  P: Proteobacteria G:*Acidibacter* |
| OTU2735  OTU8644 | P:Actinobacteriota C: MB-A2-108  P:Actinobacteriota G:*Hamadaea* |
| OTU7072 | P:Acidobacteriota F:Vicinamibacteraceae |
| OTU6644 | P:Bacteroidota G:*Pedobacter* |
| OTU75  OTU7927 | P:Chloroflexi C: Gitt-GS-136  P:Chloroflexi F: JG30-KF-CM45 |
| OTU8129  OTU7828  OTU6872 | P:Firmicutes G: *Clostridium_sensu_stricto_1*  P: Firmicutes G:*Sedimentibacter*  P: Firmicutes O: MBA03 |
| OTU7672 | P:Myxococcota G:*Haliangium* |
| OTU4090 | P:Planctomycetota G:*Gemmata* |
| FMPs，viruses | OTU7266  OTU8711  OTU7660 | P:Proteobacteria F:Comamonadaceae  P:Proteobacteria G:*Pseudaminobacter*  P:Proteobacteria G:*Luteimonas* |
| OTU8159  OTU6611 | P:Actinobacteriota G:*Pseudonocardia*  P:Actinobacteriota F:Nocardioidaceae |
| OTU3204 | P:Acidobacteriota O: Subgroup_7 |
| OTU7324 | P:Bacteroidota F:Microscillaceae |
| OTU8758  OTU5670  OTU6652  OTU7027 | P:Chloroflexi O: SBR1031  P:Chloroflexi C: KD3-96  P:Chloroflexi F: JG30-KF-CM45  P:Chloroflexi G: *FCPS473* |
| OTU6669 | P: Crenarchaeota F: Nitrososphaeraceae |
| OTU6751 | P: Abditibacteriota G:*Abditibacterium* |
| CK， fungi | OTU1587  OTU1572 | P: Ascomycota F: Nectriaceae  P: Ascomycota G: *Kernia* |
| FMPs， fungi | OTU1469 | P: Ascomycota G: *Zopfiella* |

**References:**

[1] W.B. Xun, T. Huang, W. Li, Y. Ren, W. Xiong, W. Ran, D.C. Li, Q.R. Shen, R.F. Zhang, Alteration of soil bacterial interaction networks driven by different long-term fertilization management practices in the red soil of South China, Applied Soil Ecology, 120 (2017) 128-134.

[2] J.Z. Zhou, Y. Deng, F. Luo, Z.L. He, Y.F. Yang, Phylogenetic Molecular Ecological Network of Soil Microbial Communities in Response to Elevated CO2, Mbio, 2 (2011) e00122-00111.

1. † Rui Xu and Yuchen Shi contributed equally to this work and should be considered as co-first authors

   * Corresponding author: csuliqian208018@csu.edu.cn (Q. Li); qgflab@sina.com(G.F. Qu) [↑](#footnote-ref-1)
